# Supplementary material for: Low-dose penicillin exposure in early life decreases Th17 and the susceptibility to DSS colitis in mice through gut microbiota modification
Source: PubMed Central journal article supplement (PMC5341569; doi:10.1038/srep43662), 2017-03-08
Supplement: srep43662-s1.pdf [file srep43662-s1.pdf]

## Supplementary Material

### **Low-dose penicillin exposure in early life decreases Th17 and the susceptibility to DSS colitis in mice through gut microbiota modification**

Shuang Jin, Di Zhao, Chenwen Cai, Dongjuan Song, Jun Shen, Antao Xu, Yuqi Qiao, Zihua Ran\* and Qing Zheng\*

Division of Gastroenterology and Hepatology; Key Laboratory of Gastroenterology and Hepatology, Ministry of Health; Renji Hospital, School of Medicine, Shanghai Jiao-Tong University; Shanghai Institute of Digestive Disease; Shanghai Inflammatory Bowel Disease Research Center; 160 Pujian Road, Shanghai 200127, China

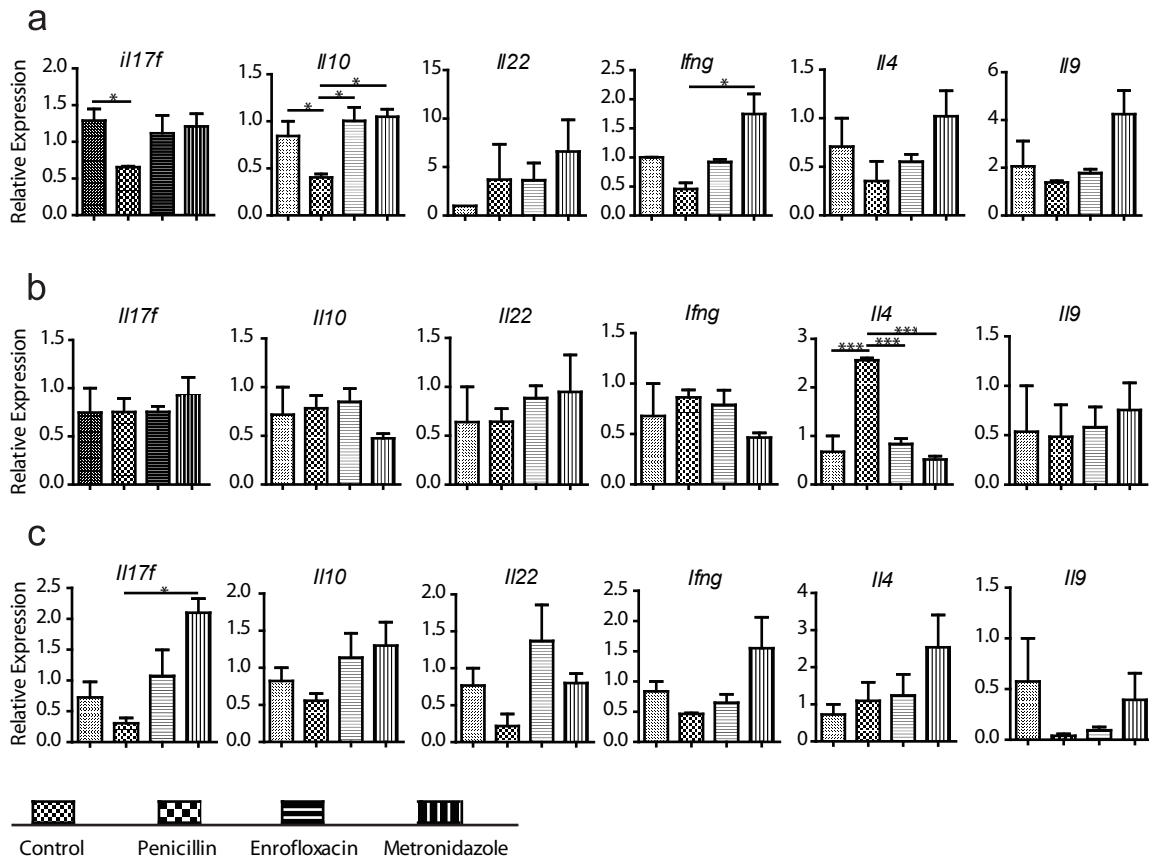

Supplementary figure S1: Low-dose antibiotics' impact on cytokine expression quantified by qPCR (n=3/group). Relative expression of indicated cytokine genes after 2-week treatment was measured in terminal ileum tissue (a), mesenteric lymph nodes (b) and Peyer's patches (c). Data are presented as mean  $\pm$  SEM. \*P<0.05, \*\* P<0.01, \*\*\*P<0.001, one-way ANOVA.

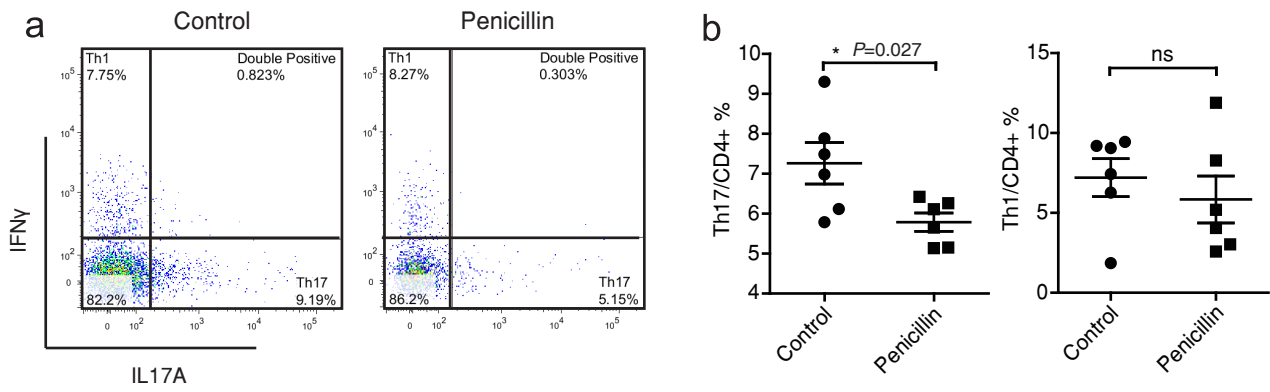

Supplementary figure S2: Two weeks' treatment of low-dose penicillin suppressed Th17 differentiation in SI-LP. (a) Intracellular staining of Small intestinal lamina propria (SI-LP) mononuclear cells for IL-17A and IFN $\gamma$  after stimulation by PMA and ionomycin. Plots were gated on CD4<sup>+</sup> cells. (b) Statistics of a. \*:  $P < 0.05$ , Student's *t*-test.

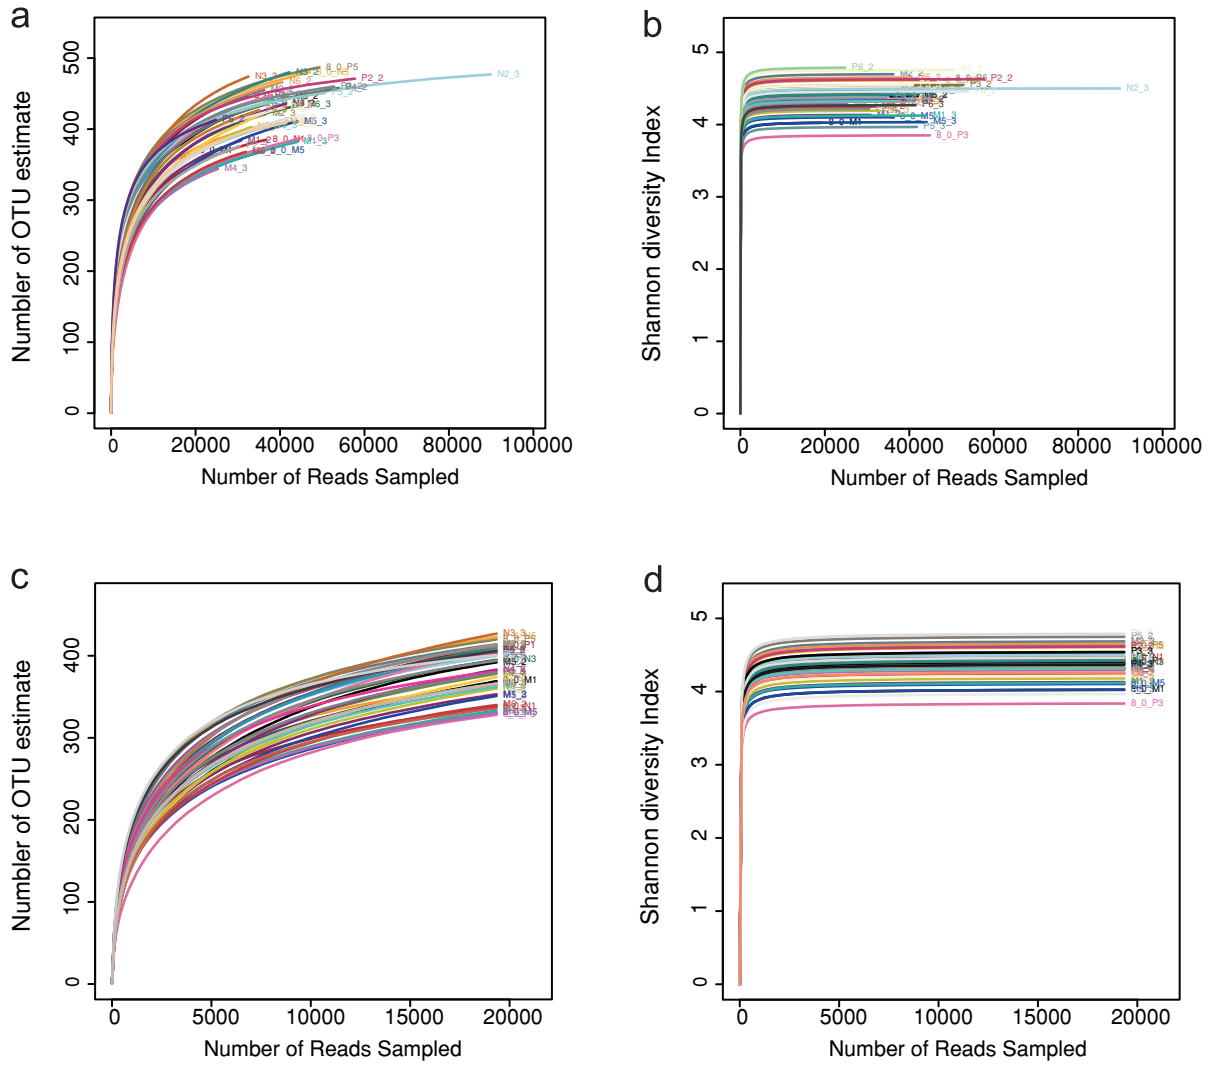

Supplementary figure S3: Rarefaction of samples. Rarefaction curves (a, c) and Shannon-Wiener curves (b, d) before rarefying of data (a, b) and after rarefying the sequence depth to 19345 reads per sample (c, d).

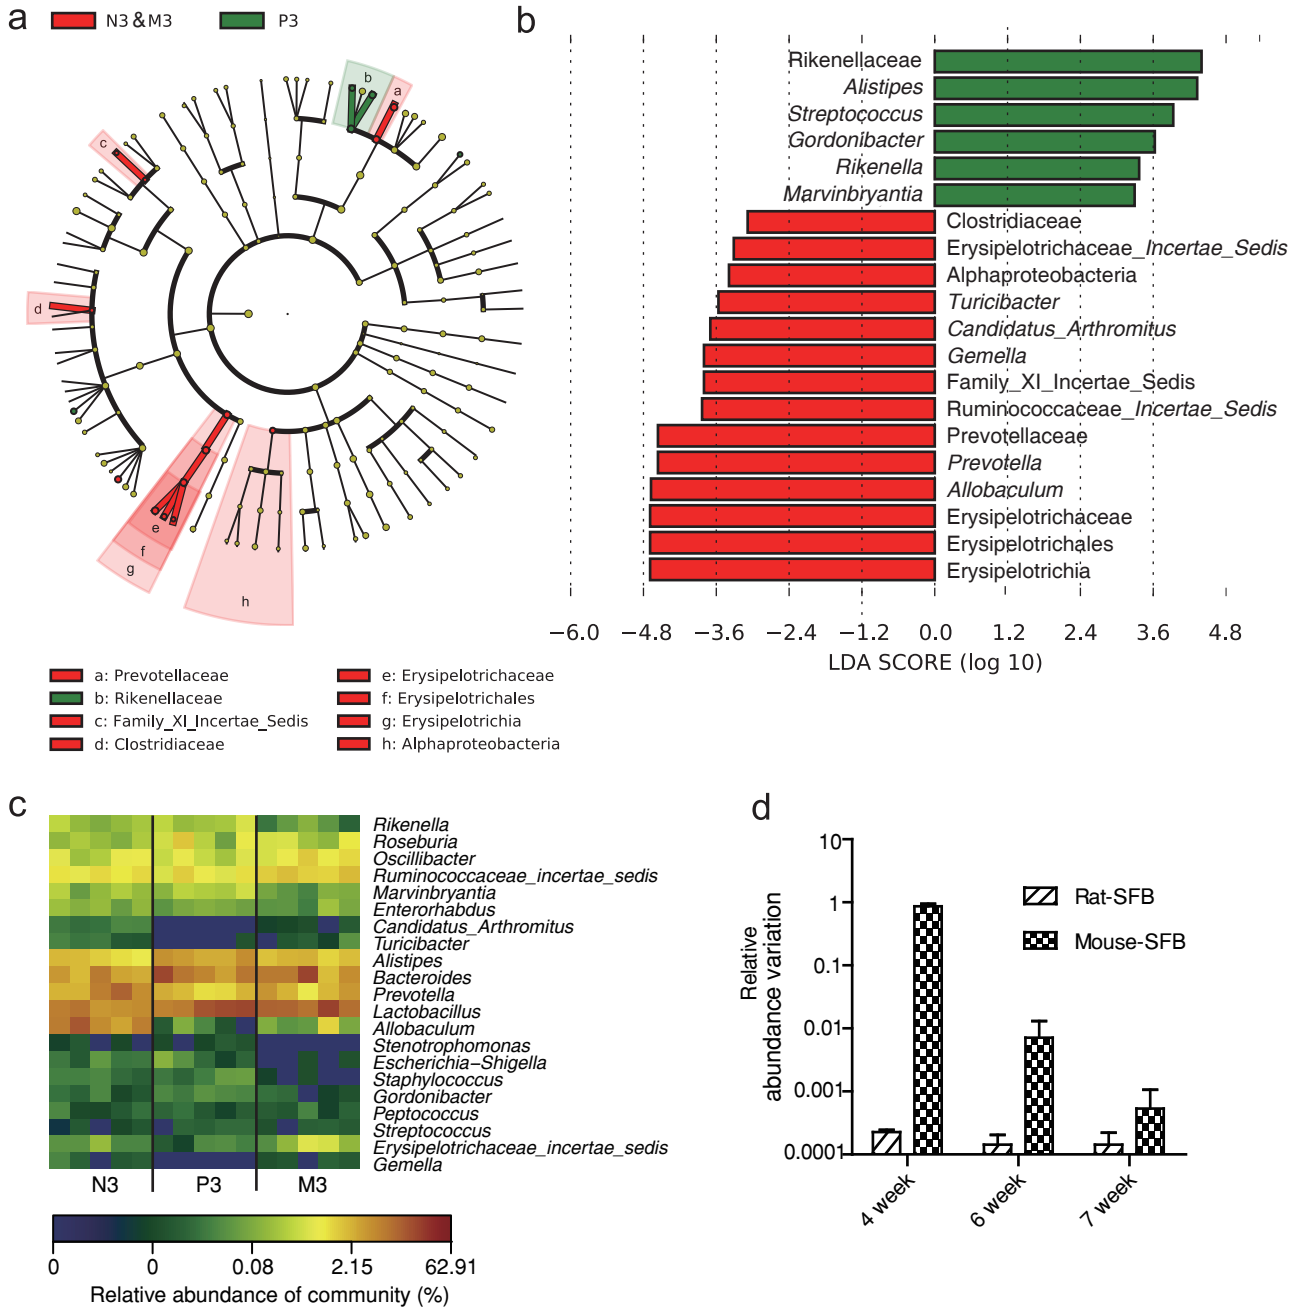

Supplementary figure S4: Key bacterial alterations after antibiotic cessation. (a) Cladogram generated by LefSe analysis showing enriched taxa in control/metronidazol super-group (red) and penicillin group (green) 3-week feces. (b) LDA scores of enriched taxa from a. (c) Heatmap showing relative abundance of key genera generated by LefSe analysis. (d) Rat-SFB and Mouse-SFB relative abundance quantified by qPCR in indicated age. Data in d are expressed as relative fold difference to one of the samples.

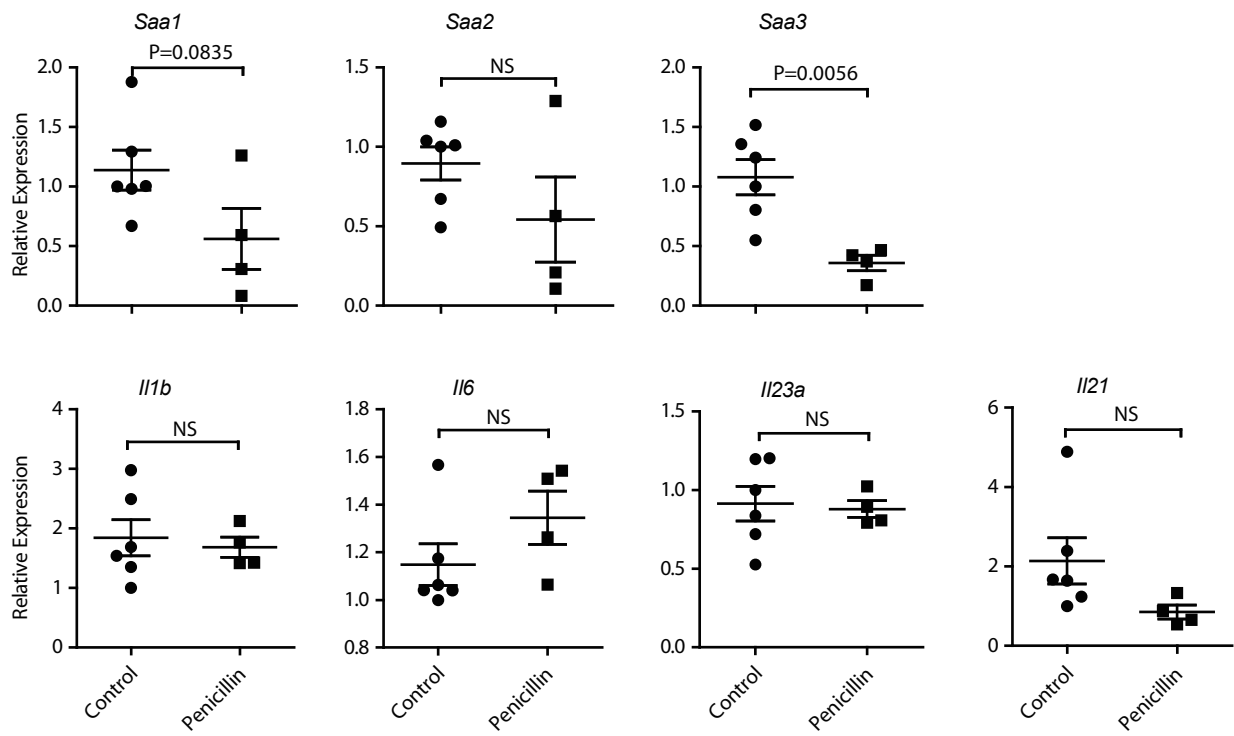

Supplementary figure S5: Relative expression of Th17-differentiation-related proteins in terminal ileum tissue. Data are represented as mean ± SEM. NS: not significant, Student's *t*-test.

**Primers used in the experiment:**

| <b>Gene</b>  | <b>Forward Primer</b>     | <b>Reverse Primer</b>   |
|--------------|---------------------------|-------------------------|
| <i>Gapdh</i> | AGGTCGGTGTGAACGGATTTG     | TGTAGACCATGTAGTTGAGGTCA |
| <i>Saa3</i>  | TGCCATCATTC TTTGCATCTTGA  | CCGTGAACTTCTGAACAGCCT   |
| <i>Saa2</i>  | TGGCTGGAAAGATGGAGACAA     | AAAGCTCTCTCTTGCATCACTG  |
| <i>Saa1</i>  | GACAGAGGATGAAGCTACTCACC   | CCTTGGAAGCCTCGTGAAC     |
| <i>Il1b</i>  | GCAACTGTTCTGAACTCAACT     | ATCTTTTGGGGTCCGTCAACT   |
| <i>Il6</i>   | CCTACCCCAATTTCCAATGCTCTCC | GCATAACGCACTAGGTTTGCCGA |
| <i>Il23a</i> | CAGCAGCTCTCTCGGAATCTC     | TGGATACGGGGCACATTATTTTT |
| <i>Il21</i>  | GGACCCTTGCTGTCTGGTAG      | TGTGGAGCTGATAGAAGTTCAGG |
| <i>Il9</i>   | TTGTGTCTCTCCGTCCCAAC      | TGGTCAGCTGTAACAGTCCC    |
| <i>Il22</i>  | CAGCTCAGCTCCTGTCACATC     | AGTTCCCAATCGCCTTGAT     |
| <i>Il4</i>   | TCGGCATTTTGAACGAGGTC      | TGGTGTCTTCGTTGCTGTGA    |
| <i>Ifng</i>  | AGACAATCAGGCCATCAGCAA     | TGTGGGTGTTGACCTCAAAC    |
| <i>Il17a</i> | ACCTCACACGAGGCACAAGT      | GCAACAGCATCAGAGACACAGA  |
| <i>Il17f</i> | AATCCTGGTCCTTCGGAGGG      | GCCAACTTTTAGGAGCATCTTCT |
| <i>Il10</i>  | CAGGACTTTAAGGGTTACTTGGGT  | GCCTGGGGCATCACTTCTAC    |

**Supplementary Table S1:** Primers used in qPCR, related to Fig. 2, Supplementary Fig. S1 and Supplementary Fig. S5.
